# Supplementary material
Source: PubMed Central journal article supplement (PMC4137745)

## **Blockade of IL-33 release, and suppression of type 2 innate lymphoid cell responses, by helminth secreted products in airway allergy**

**Henry J McSorley *et al.***

### **Supplementary Material**

#### **Supplementary Figure 1**

Complete cell profile of BAL (some data are also in Figure 1). Supp Figure 1: Bronchoalveolar lavage cells (A) and lung tissue cells (B) were treated with *Alternaria*, OVA and HES as described in Figure 1. Numbers of eosinophils (SiglecF+CD11c-), Neutrophils (CD11b+GR1+), alveolar macrophages (CD11c+SiglecF+) and Thelper cells (CD4+) were then assessed by flow cytometry. \*\*\* =  $p < 0.001$ , \*\* =  $p < 0.01$ , \* =  $p < 0.05$ , when Alt-OVA-HES:OVA groups was compared to Alt-OVA:OVA group. ### =  $p < 0.001$ , ## =  $p < 0.01$ , # =  $p < 0.05$ , when Alt-OVA:OVA groups was compared to Alt-OVA:PBS group.

#### **Supplementary Figure 2**

Gating strategy for type II Innate Lymphoid Cells (ILC2), and representative plots of IL-4, IL-5 and IL-13 staining on ILC2s after 4 h PMA/Ionomycin/BrefeldinA stimulation.

#### **Supplementary Figure 3**

DO11.10 cells were transferred, and the *Alternaria*/OVA model carried out as described in Fig. 2 H-J. Absolute numbers of lymph node (LN) (A) and lung (C), or proportions of lung (B) IL-4+CD4+KJ126+ were calculated.

#### **Supplementary Figure 4**

Absolute lung eosinophil cell numbers were calculated from mice deficient in RAG (A), IL-17RB (B), IL-17RBxST2 (C), MyD88xTRIF (D) or TLR4 (E) or wild-type controls shown in Fig. 3.

### **Supplementary Figure 5**

Representative staining for CD44 and CD25 in IL-13-GFP+Lineage- cells after treatment with *Alternaria* +/- HES, as described in **Fig. 4 B**.

### **Supplementary Figure 6**

48 h after *Alternaria* administration with or without HES to C57BL/6 wild-type or RAG-deficient mice, cell-free BAL fluid was tested for levels of IL-5 (**A**), RELM $\alpha$  (**B**) and Ym1 (**C**). Significance compares *Alternaria* level to *Alternaria* + HES level.

### **Supplementary Figure 7**

Gating strategy and representative plots for IL-33-Citrine mice treated with *Alternaria*, OVA and HES as described in **Fig. 5 G**.

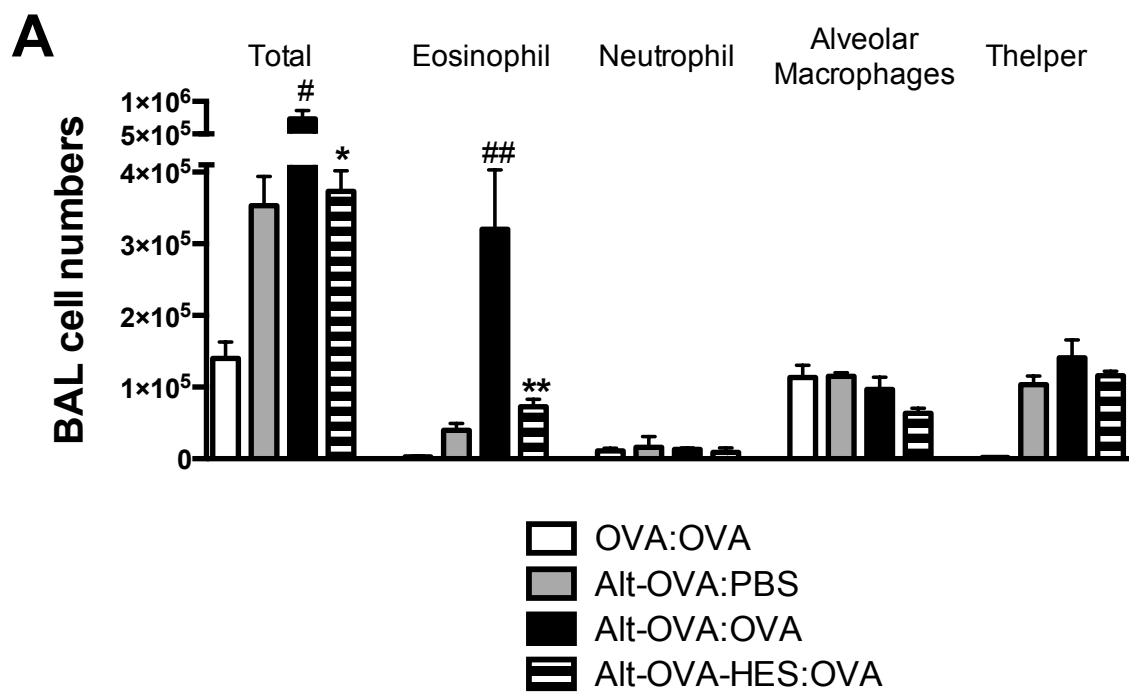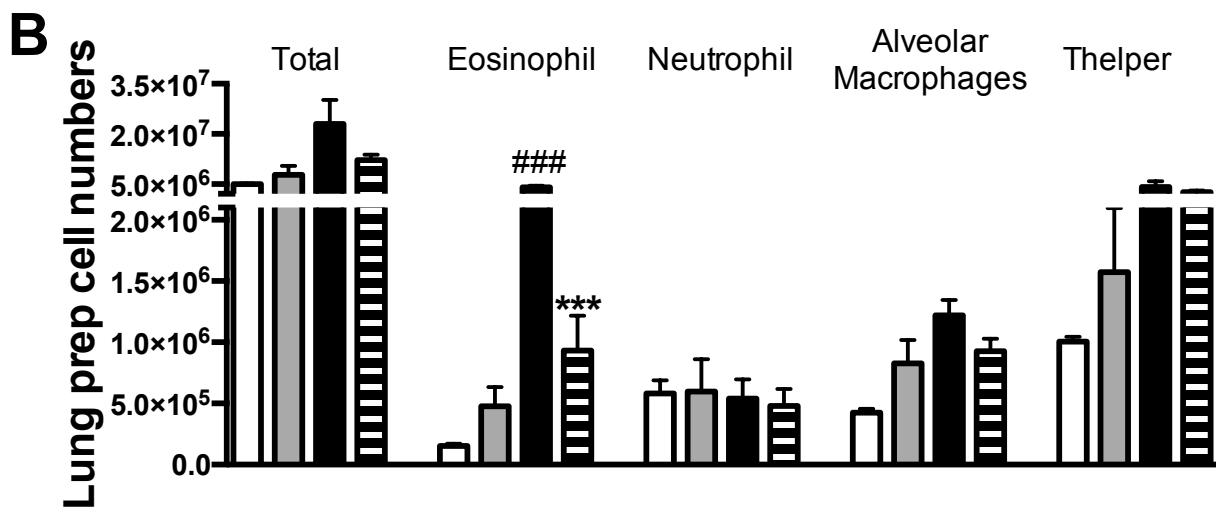

McSorley et al., Supplementary Figure 2

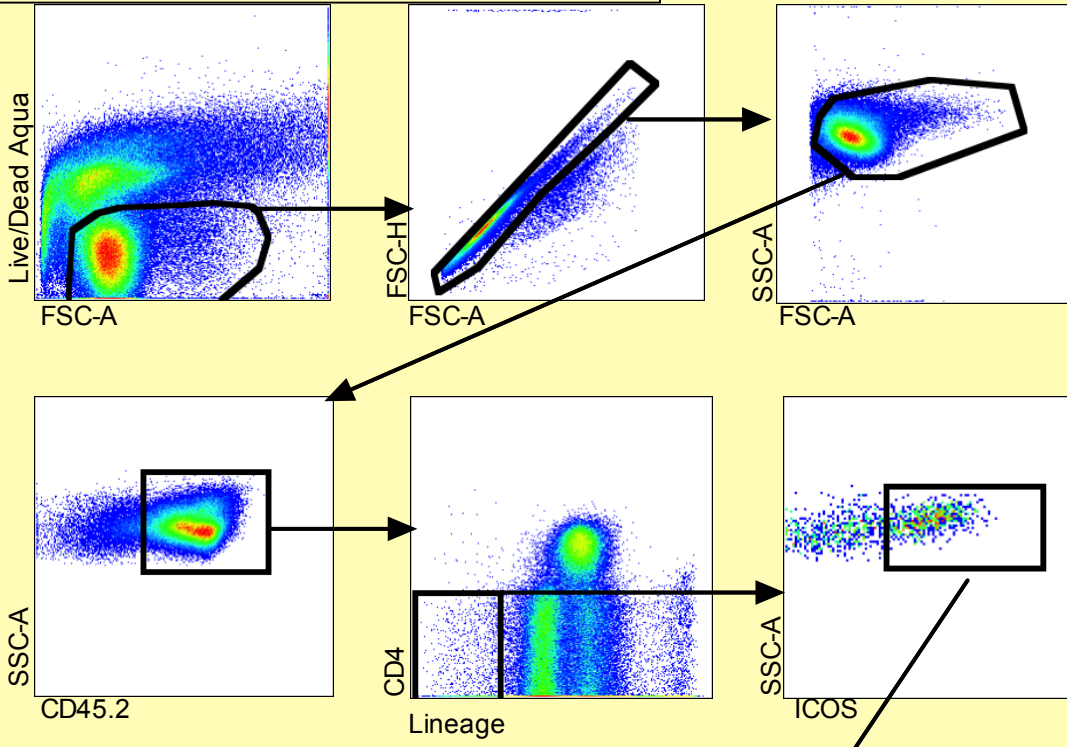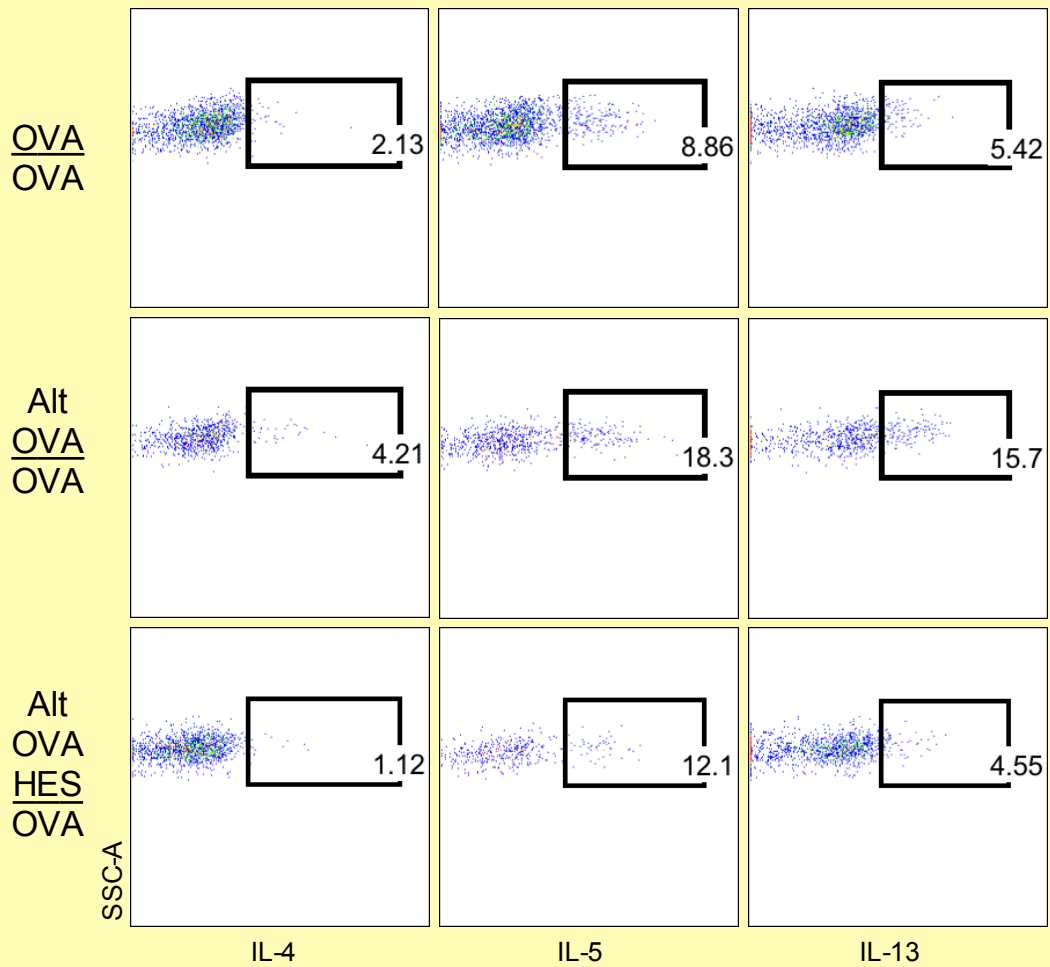

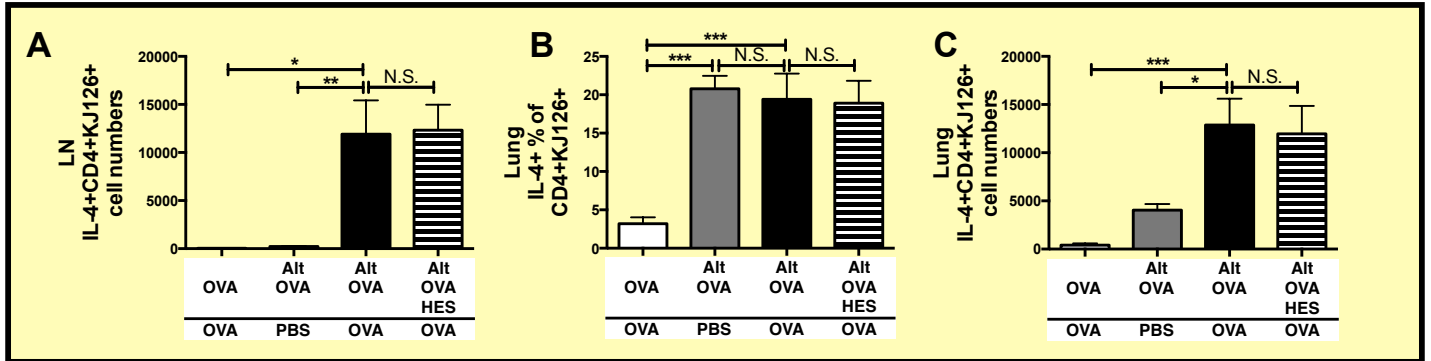

McSorley et al.,  
Supplementary  
Figure 4

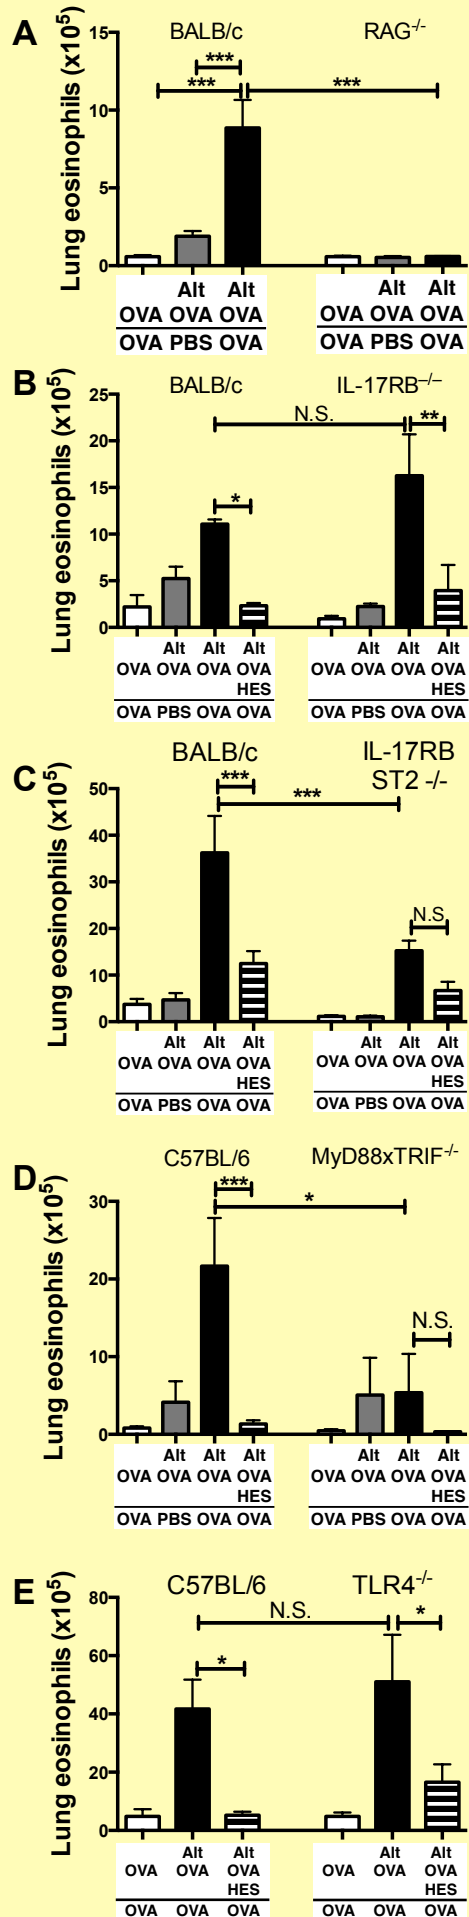

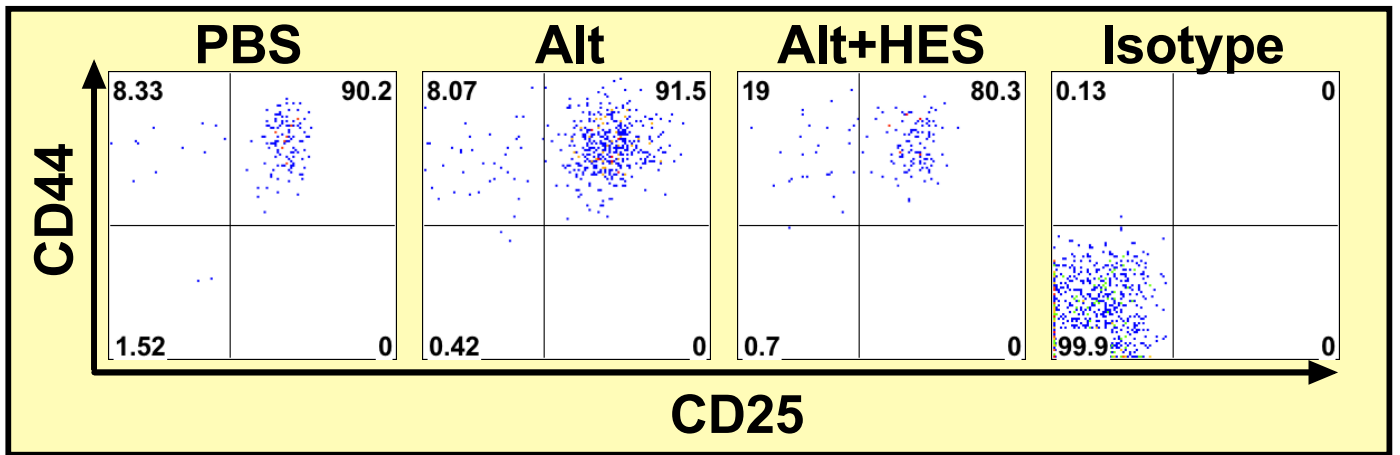

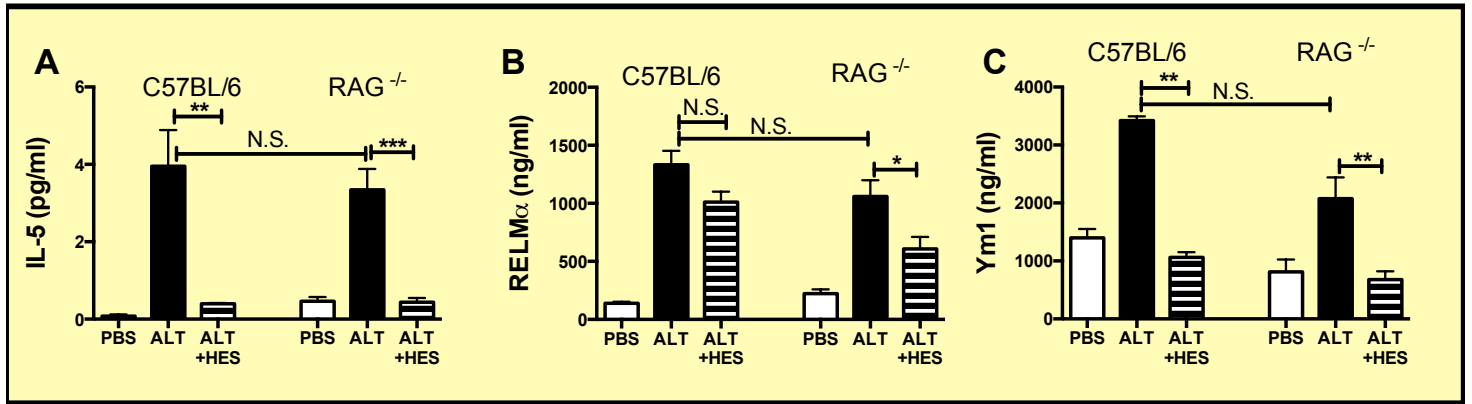



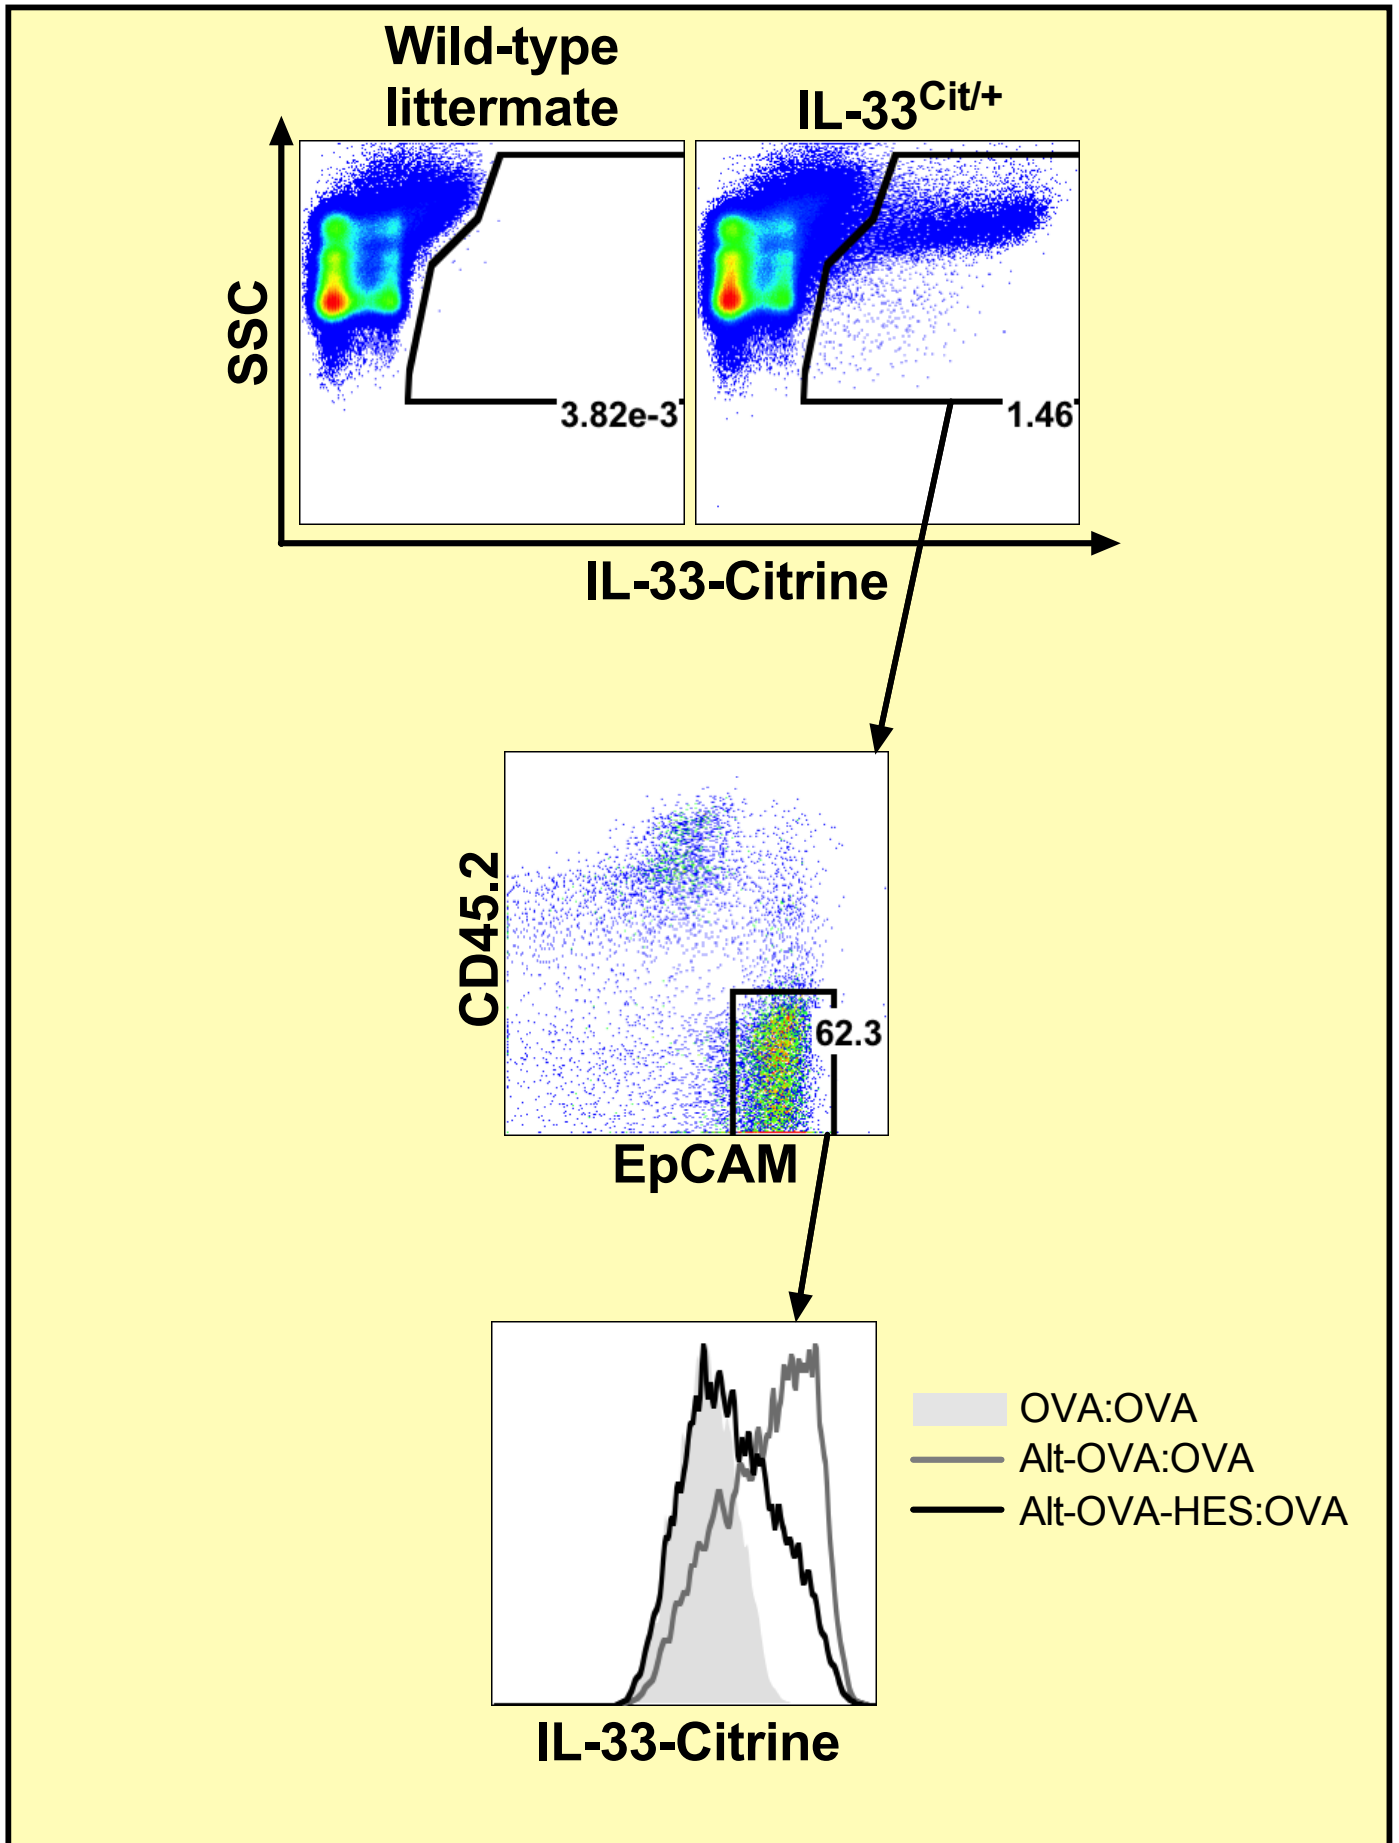

Supplement: mi2013123x1.pdf [file mi2013123x1.pdf]
